# Supplementary material
Source: Springer Nature journal article supplement (https://www.springermedizin.de/resource/supplementary/13054_2013_2879_MOESM8_ESM.pdf/9714092)
Supplement: MOESM8 [file 9714092]

## 5. Differences between this systematic review and the most recent Cochrane review

Papers in Cochrane Review: Differences between selections of studies for analysis.

| Paper              | Decision                                               | Reason                                   |
|--------------------|--------------------------------------------------------|------------------------------------------|
| Adelson 2005 HYPO1 | Exclusion                                              | Paediatric patients                      |
| Adelson 2005 HYPO2 | Exclusion                                              | Paediatric patients                      |
| Aibiki 2000        | Exclusion                                              | Paediatric patients                      |
| Biswas 2002        | Exclusion                                              | Paediatric patients                      |
| Clifton 1992       | Cannot access – author unable to provide copy of paper |                                          |
| Clifton 1993       | Inclusion                                              | Met inclusion criteria                   |
| Clifton 2001       | Inclusion                                              | Met inclusion criteria                   |
| Harris 2009        | Exclusion                                              | Not measuring GOS                        |
| Hashiguchi 2003    | Inclusion                                              | Met inclusion criteria                   |
| Hirayama 1994      | Inclusion                                              | Met inclusion criteria                   |
| Hutchison 2008     | Exclusion                                              | Paediatric patients                      |
| Ishikura 1998      | Exclusion                                              | Symposium presentation                   |
| Jiang 2000         | Inclusion                                              | Met inclusion criteria                   |
| Marion 1997        | Inclusion                                              | Met inclusion criteria                   |
| Meissner 2003a     | Exclusion                                              | Not measuring GOS, thyroid function only |
| Meissner 2003b     | Exclusion                                              | Not measuring GOS, thyroid function only |
| Qiu 2007           | Inclusion                                              | Met inclusion criteria                   |
| Shiozaki 1993      | Inclusion                                              | Met inclusion criteria                   |
| Shiozaki 1999      | Inclusion                                              | Met inclusion criteria                   |
| Shiozaki 2001      | Exclusion                                              | Paediatric patients                      |
| Smrcka 2005        | Included                                               | Met inclusion criteria                   |
| Yan 2001           | Exclusion                                              | Not measuring GOS                        |
| Zhang 2000         | Cannot access paper                                    |                                          |
